# Supplementary material
Source: PubMed Central journal article supplement (PMC117521)
Supplement: pnas_012578499_1.pdf [file pnas_012578499_1.pdf]

Supporting information for Wilmes and Bell (December 26, 2001) *Proc. Natl. Acad. Sci. USA*, 10.1073/pnas.012578499.

**Table 3. B2 mutant sequences**

| Sequence    | % Plasmid loss/generation | SD of plasmid loss | Best match to ACS/11 | Helical stability, Kcal/Mol | No. of As/11 | No. of Ts/11 |
|-------------|---------------------------|--------------------|----------------------|-----------------------------|--------------|--------------|
| CCAATCTTTAA | 1.6                       | 1.9                | 7                    | 6.2                         | 4            | 4            |
| AAATGCTAATC | 1.6                       | 2.9                | 6                    | 5.8                         | 5            | 3            |
| AATGCGAAAAC | 1.8                       | 1.6                | 7                    | 7.7                         | 6            | 1            |
| CTAAACCTCTA | 2.0                       | 0.9                | 8                    | 6.7                         | 4            | 3            |
| AAACAAATATA | 2.1                       | 1.9                | 8                    | 3.4                         | 8            | 2            |
| AAACAAATATA | 2.5                       | 2.3                | 8                    | 3.4                         | 8            | 2            |
| TAACATAACAA | 2.6                       | 1.1                | 8                    | 4.4                         | 7            | 2            |
| ATTATCGTTAA | 2.9                       | 1.8                | 8                    | 4.5                         | 4            | 5            |
| GTTTACAAAAC | 2.9                       | 1.5                | 7                    | 6.3                         | 5            | 3            |
| AAAATGATATA | 2.9                       | 0.4                | 8                    | 3.2                         | 7            | 3            |
| AACTACTAAAT | 3.2                       | 2.0                | 7                    | 3.8                         | 6            | 3            |
| CATACATAACT | 3.3                       | 1.3                | 8                    | 5.0                         | 5            | 3            |
| AAACAAATATA | 3.6                       | 1.5                | 8                    | 3.4                         | 8            | 2            |
| ATTAAAATGCT | 3.6                       | 3.5                | 6                    | 4.4                         | 5            | 3            |
| CCAAACAAAAC | 3.7                       | 1.7                | 8                    | 8.0                         | 7            | 0            |
| TACCAATTATA | 3.7                       | 0.5                | 6                    | 4.0                         | 5            | 4            |
| TCAATGTTTAA | 3.8                       | 1.0                | 8                    | 4.8                         | 4            | 5            |
| CAAAAAGATTA | 3.8                       | 1.3                | 7                    | 5.0                         | 7            | 2            |
| GTAAAAGACT  | 3.9                       | 0.8                | 6                    | 5.6                         | 5            | 3            |
| CTAAATAGATA | 3.9                       | 1.9                | 9                    | 3.8                         | 6            | 3            |
| CACAAACTTAA | 3.9                       | 1.0                | 7                    | 6.2                         | 6            | 2            |
| TATTCCTAAT  | 3.9                       | 0.7                | 6                    | 5.0                         | 3            | 5            |
| AATTACGAAAT | 4.0                       | 0.7                | 7                    | 4.5                         | 6            | 3            |
| CTAAACAAAAG | 4.0                       | 0.5                | 9                    | 6.1                         | 7            | 1            |
| GCAAATGTTAA | 4.0                       | 1.5                | 9                    | 6.3                         | 5            | 3            |
| GACATAAACAC | 4.1                       | 2.0                | 6                    | 7.1                         | 6            | 1            |

|              |     |     |   |      |   |   |
|--------------|-----|-----|---|------|---|---|
| ATAAAAATGTC  | 4.1 | 0.4 | 7 | 4.8  | 6 | 3 |
| TACATTCAAAA  | 4.1 | 1.1 | 8 | 4.8  | 6 | 3 |
| CAACAGTAAAT  | 4.1 | 1.2 | 8 | 5.6  | 6 | 2 |
| TAACTAACGCT  | 4.2 | 1.6 | 7 | 5.2  | 5 | 3 |
| TTAAATTCGCG  | 4.2 | 1.8 | 6 | 7.3  | 3 | 4 |
| CAACATGAATA  | 4.2 | 1.0 | 8 | 6.0  | 6 | 2 |
| GTTTATTTCCA  | 4.2 | 0.9 | 6 | 6.3  | 2 | 6 |
| CAACAAGACGT  | 4.3 | 1.7 | 5 | 8.3  | 5 | 1 |
| TATAAAATTAC  | 4.3 | 1.8 | 7 | 2.8  | 6 | 4 |
| GTTAATGTACC  | 4.3 | 1.0 | 8 | 6.9  | 3 | 4 |
| CGGCTAAATAC  | 4.4 | 1.1 | 4 | 8.1  | 4 | 2 |
| TGATAAACGCT  | 4.5 | 0.6 | 5 | 5.5  | 5 | 3 |
| CGAATCTTAAA  | 4.5 | 0.9 | 8 | 6.1  | 4 | 5 |
| ATGAATTTAGT  | 4.5 | 1.3 | 7 | 4.2  | 5 | 3 |
| CTAAATACTGA  | 4.5 | 1.5 | 8 | 5.4  | 5 | 4 |
| GATTAATTAAG  | 4.6 | 1.2 | 6 | 4.3  | 5 | 5 |
| TAAAAGTATTT  | 4.6 | 1.2 | 8 | 2.9  | 7 | 3 |
| ATAAACCGCCA  | 4.6 | 1.3 | 7 | 8.7  | 5 | 5 |
| AATTAAAACAT  | 4.6 | 1.3 | 6 | 3.4  | 4 | 1 |
| TGAATTATTAA  | 4.7 | 1.4 | 8 | 3.2  | 3 | 4 |
| GAAACCGCTGA  | 4.7 | 1.8 | 7 | 10.0 | 7 | 1 |
| TAAAAACAGGA  | 5.0 | 1.3 | 7 | 6.1  | 3 | 4 |
| CTTTACGTATA  | 5.3 | 2.0 | 8 | 5.3  | 5 | 1 |
| AGTACCTAAAA  | 5.4 | 3.3 | 8 | 5.7  | 6 | 2 |
| CTTAAATTGTT  | 5.6 | 3.1 | 5 | 4.6  | 6 | 3 |
| TCTCATGATTG  | 6.6 |     | 4 | 6.8  | 2 | 5 |
| CTTGGCTCGCC  | 7.1 | 2.2 | 3 | 12.3 | 0 | 5 |
| TTTCGTACCGC  | 7.5 | 0.6 | 4 | 9.6  | 1 | 4 |
| TTCACAGACTG  | 7.6 |     | 5 | 8.1  | 3 | 3 |
| TACCCTATTAC  | 7.9 | 0.1 | 6 | 6.2  | 3 | 4 |
| TTACTACTCCTA | 8.0 | 1.3 | 6 | 6.5  | 7 | 4 |
| GTTTATTTCCA  | 8.5 | 1.7 | 6 | 6.3  | 2 | 6 |
| GTAAACCCAT   | 8.6 | 0.6 | 5 | 7.1  | 2 | 6 |

|              |      |     |   |      |   |   |
|--------------|------|-----|---|------|---|---|
| TAGTGA CTTCG | 9.3  |     | 3 | 7.8  | 4 | 5 |
| ATCACGATGAC  | 9.4  |     | 6 | 8.3  | 4 | 3 |
| TACATTAATTC  | 10.0 | 1.2 | 5 | 4.2  | 2 | 4 |
| GCACAAGCACG  | 10.1 |     | 5 | 11.0 | 4 | 2 |
| CCAATCTTTAA  | 10.1 | 6.2 | 7 | 6.2  | 0 | 3 |
| TCTTTTAGCAT  | 10.4 | 0.6 | 4 | 5.3  | 2 | 7 |
| CCCTTCACTAT  | 10.4 |     | 4 | 7.8  | 4 | 0 |
| AACGTAGATCG  | 10.5 |     | 5 | 8.0  | 3 | 2 |
| CCAAGTTTCTT  | 10.7 | 1   | 5 | 7.2  | 2 | 6 |
| TTTTACGAGTG  | 10.9 | 5.6 | 5 | 7.0  | 2 | 4 |
| TTGACCTGAGA  | 10.9 |     | 6 | 8.3  | 4 | 2 |
| CTTGACCTCA   | 11.2 |     | 3 | 9.8  | 3 | 3 |
| CCTCGTGTTTA  | 11.4 |     | 5 | 8.5  | 2 | 3 |
| ATTTTCGATAG  | 11.7 | 3.1 | 5 | 5.7  | 1 | 5 |
| TTATTTACTTG  | 11.9 | 1.9 | 5 | 4.3  | 2 | 5 |
| TCCTGACTTGC  | 12.5 |     | 2 | 9.5  | 2 | 3 |
| GTTGTCAACCA  | 13.5 |     | 5 | 8.9  | 3 | 3 |
| GATTCCGCGGT  | 13.8 | 5.4 | 4 | 10.9 | 1 | 3 |
| TGCTCCCAAAC  | 15.0 | 4.3 | 5 | 9.8  | 3 | 3 |
| CTTCCTGGCTT  | 15.0 | 6.6 | 4 | 9.4  | 4 | 4 |
| AGTCCTTTCAT  | 16.0 | 3.3 | 5 | 6.8  | 0 | 5 |
| AATCTACCTTC  | 16.4 | 5.4 | 4 | 6.8  | 2 | 5 |
| CTTCTCGGGTT  | 17.5 |     | 4 | 9.5  | 0 | 5 |
| TGATCCTCACA  | 23.1 | 6.4 | 6 | 8.2  | 3 | 4 |
